# Supplementary material
Source: publisher figshare collection journal article supplement (https://acs.figshare.com/ndownloader/files/12799058)
Supplement: Supplementary file 1 [file 12799058]

## **Supporting Information**

### **Conjugated Polymers Containing Sulfonic Acid Fluorene Unit for Achieving Multiple Interfacial Modifications in Fullerene-free Organic Solar Cells**

Lili Lu, Qian Kang, Chenyi Yang, Bowei Xu\*, Jianhui Hou\*

## Experimental Section

### Device fabrication

*Devices D1-D3, E1-E2, F1-F3 were fabricated taking PFS, PFSF and PFB as anode interlayers (AIL) and cathode interlayers (CIL) simultaneously.*

The devices structure of D-type (ITO/interlayer/J52-2F: ITM/Interlayer/Al), E-type (ITO/interlayer/PBDTTTEFT: IEICO-4F/Interlayer/Al) and F-type (ITO/interlayer/PBDB-T: ITIC/Interlayer/Al) were fabricated according to the following conditions:

The pre-cleaned ITO-coated glass substrates were UV/ozone-treated for 20 min. PFS and PFSF were dissolved in methanol with the optimal concentration of 1.5mg/ml and spin-coated on the ITO-electrode according to the devices A-1 mentioned above. All the photoactive materials J52-2F: ITM (D/A1:1), PBDTTTEFT: IEICO-4F (D/A 1:2) and PBDB-T: ITIC (D/A 1:1) were dissolved in CB at the polymer concentration of 10 mg/mL. To dissolve the polymers fully, active layer solution PBDB-T: ITIC was stirred at 40 °C, PBDTTTEFT: IEICO-4F and J52-2F: IT-M at 60 °C for 2 h at least. Before spin-coating, 1, 8-iodooctane (0.5%, v/v) was added to the active layers solution J52-2F: IT-M and PBDB-T: ITIC. In addition, chloronaphthalene (3%, v/v) was added to PBDTTTEFT: IEICO-4F. For the cathode interlayer, PFN-Br was dissolved in methanol with the concentration of 0.5 mg/mL, and 0.2mg/ml PFS, PFSF were prepared to be spin-coated (3000rpm/min, 30s) on the

photoactive layer. At last, Al was evaporated on the substrate as cathode under high vacuum.

### **Characterization and Measurement.**

The PCE of devices were measured under  $100 \text{ mW/cm}^2$  AM1.5G light source, using an AAA solar simulator. Standard silicon reference cell was purchased from Enli Technology Co., Ltd. The effective area of the device calibrated by microscope is  $3.7 \text{ mm}^2$ . The EQE spectrum was measured by a Solar Cell Spectral Response Measurement System QE-R3011 from Enli Technology Co., Ltd.

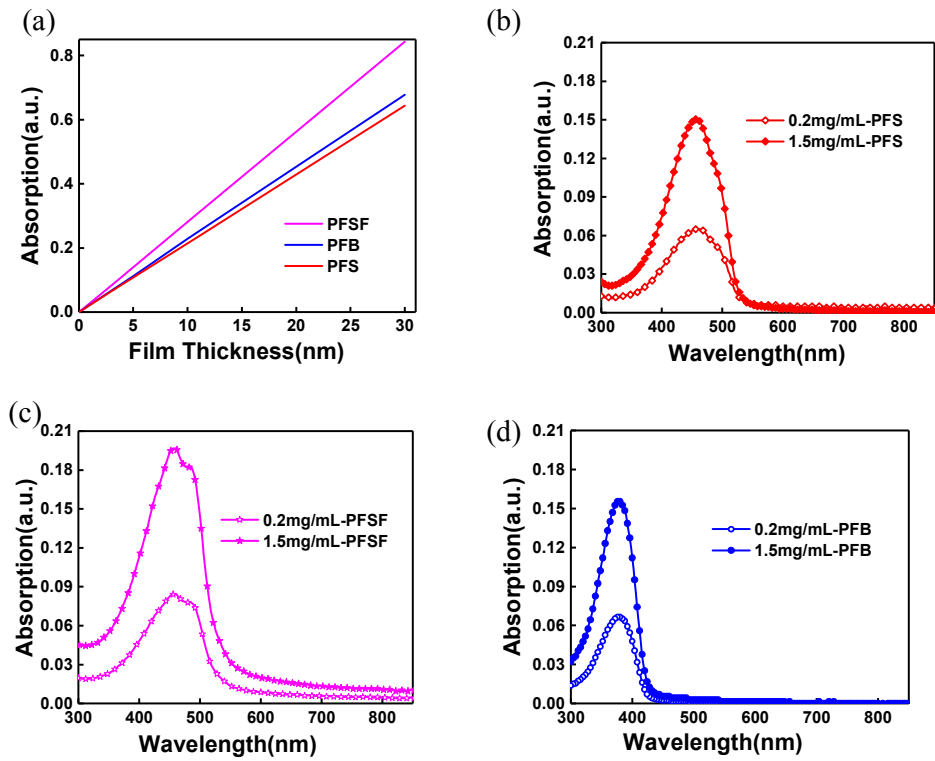

**Figure S1.** (a) The relationship curves of film thickness and UV-vis absorption, (b) the UV-vis absorption curve of PFS, PFSF and PFB with concentration of 0.2mg/mL and 1.5mg/mL.

**Table S1.** The parameters of thickness and absorption relations.

| interlayers | concentrations<br>(mg/mL) | absorption peak<br>intensity | thickness<br>(nm) |
|-------------|---------------------------|------------------------------|-------------------|
| PFS         | 0.2                       | 0.065                        | 3                 |
|             | 1.5                       | 0.150                        | 7                 |
| PFSF        | 0.2                       | 0.084                        | 3                 |
|             | 1.5                       | 0.197                        | 7                 |
| PFB         | 0.2                       | 0.067                        | 3                 |
|             | 1.5                       | 0.157                        | 7                 |

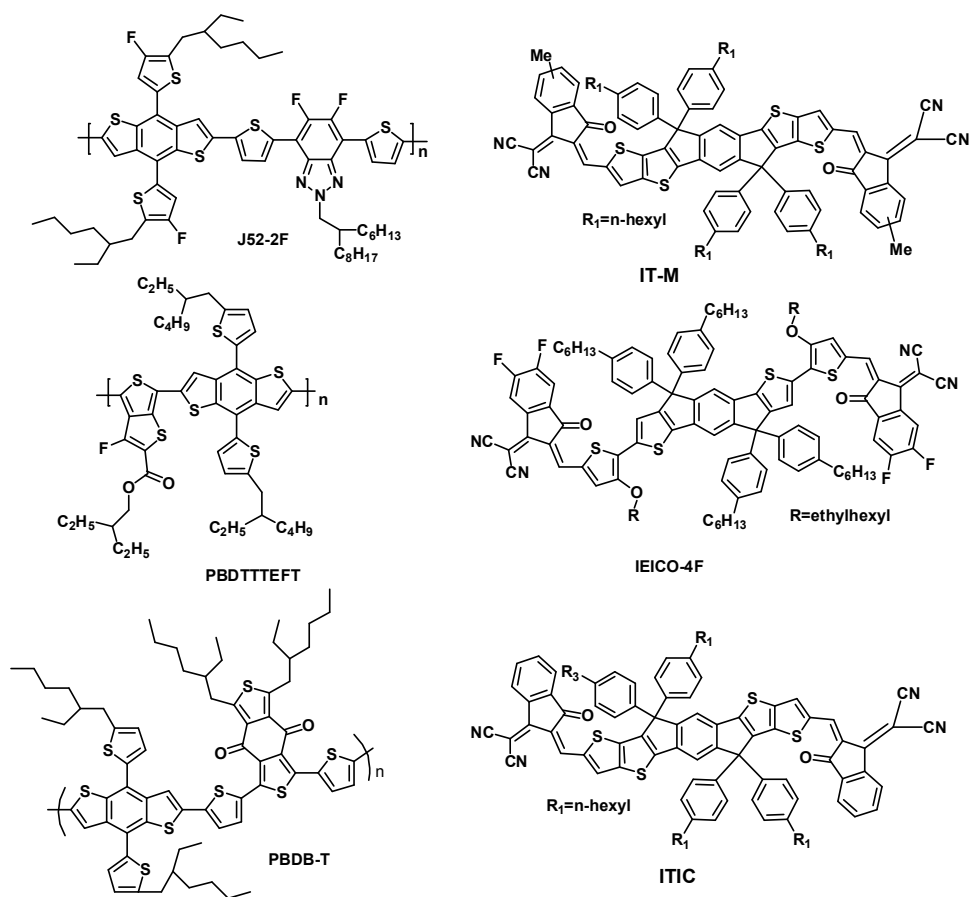

**Figure S2.** Chemical structures of photoactive layer materials for D-type device

J52-2F: IT-M, E-type device PBDTTTTEFT: IEICO-4F and F-type device PBDB-T:

ITIC.

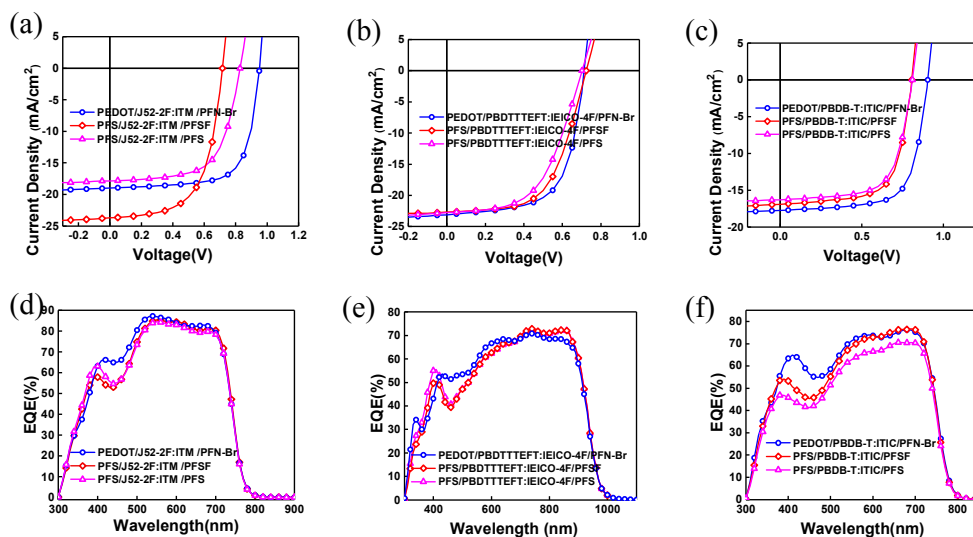

**Figure S3.** The J-V curves of (a) D-type devices: AIL/J52-2F:ITM/CIL, (b) E-type devices: AIL/ PBDTTTTEFT: IEICO-4F /CIL and (c) F-type devices: AIL/ PBDB-T: ITIC /CIL. The corresponding EQE curves of (d) D-type devices, (e) E-type devices and (f) F-type devices.

**Table S2.** Photovoltaic parameters of the devices D1-D3, E1-E3 and F1-F3.

| Num. | device structures  | $V_{oc}$ | $J_{sc}$              | $J_{cal}$             | FF   | PCE  |
|------|--------------------|----------|-----------------------|-----------------------|------|------|
|      |                    | (V)      | (mA/cm <sup>2</sup> ) | (mA/cm <sup>2</sup> ) |      | (%)  |
| D1   | PEDOT/ BHJ /PFN-Br | 0.951    | 19.0                  | 18.3                  | 70.1 | 12.7 |
| D2   | PFS/ BHJ /PFS      | 0.828    | 17.9                  | 17.5                  | 63.7 | 9.43 |
| D3   | PFS/ BHJ /PFSF     | 0.917    | 18.1                  | 17.7                  | 63.2 | 10.4 |
| E1   | PEDOT/ BHJ /PFN-Br | 0.713    | 23.1                  | 22.2                  | 64.0 | 10.6 |
| E2   | PFS/ BHJ /PFS      | 0.702    | 22.8                  | 21.9                  | 54.1 | 8.65 |
| E3   | PFS/ BHJ /PFSF     | 0.723    | 22.7                  | 21.7                  | 58.5 | 9.61 |
| F1   | PEDOT/ BHJ /PFN-Br | 0.905    | 17.7                  | 16.5                  | 69.1 | 11.1 |
| F2   | PFS/ BHJ /PFS      | 0.812    | 16.3                  | 14.4                  | 66.6 | 8.78 |
| F3   | PFS/ BHJ /PFSF     | 0.807    | 16.9                  | 15.8                  | 67.4 | 9.20 |

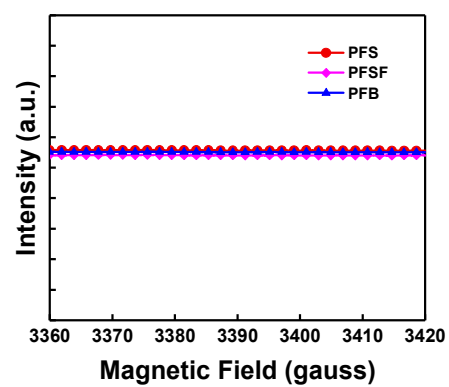

**Figure S4.** Electron Paramagnetic Resonance (EPR) curves of PFS, PFSF, and PFB.
